# Supplementary material for: First Description of Simplicillium lanosoniveum, a Potential Antagonist of the Coffee Leaf Rust from Cuba
Source: MDPI journal article supplement (doi:10.3390/applmicrobiol4010018), 2024-01-26
Supplement: s1 [file s1]

Supplementary:

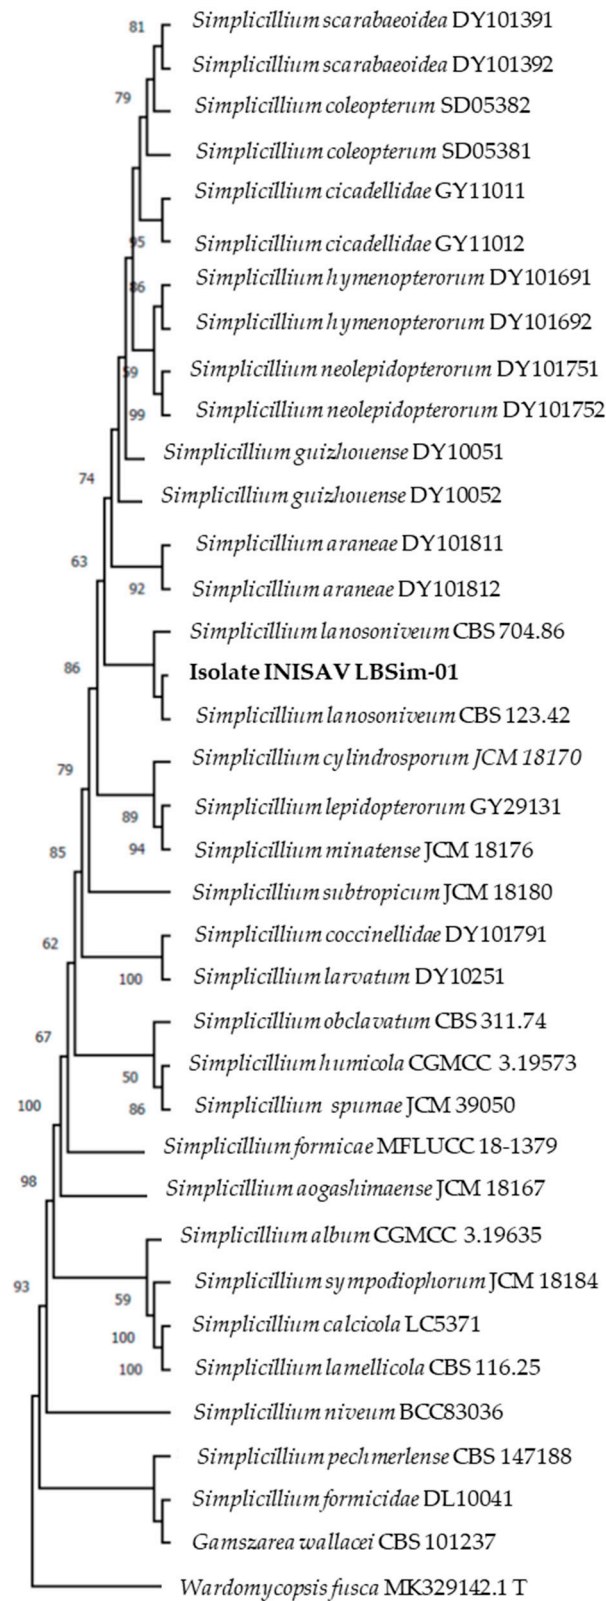

**Supplementary Figure. S1.** Phylogenetic relationships of isolate LBSim-01 with related taxa derived from maximum-likelihood (ML) analysis using the concatenated sequences of ITS, LSU and EF1A with *Wardomyces fusca* as the outgroup. RA×ML bootstrap support values (ML ≥ 70) were shown at the nodes. Bar = 0.02 substitutions per nucleotide position.

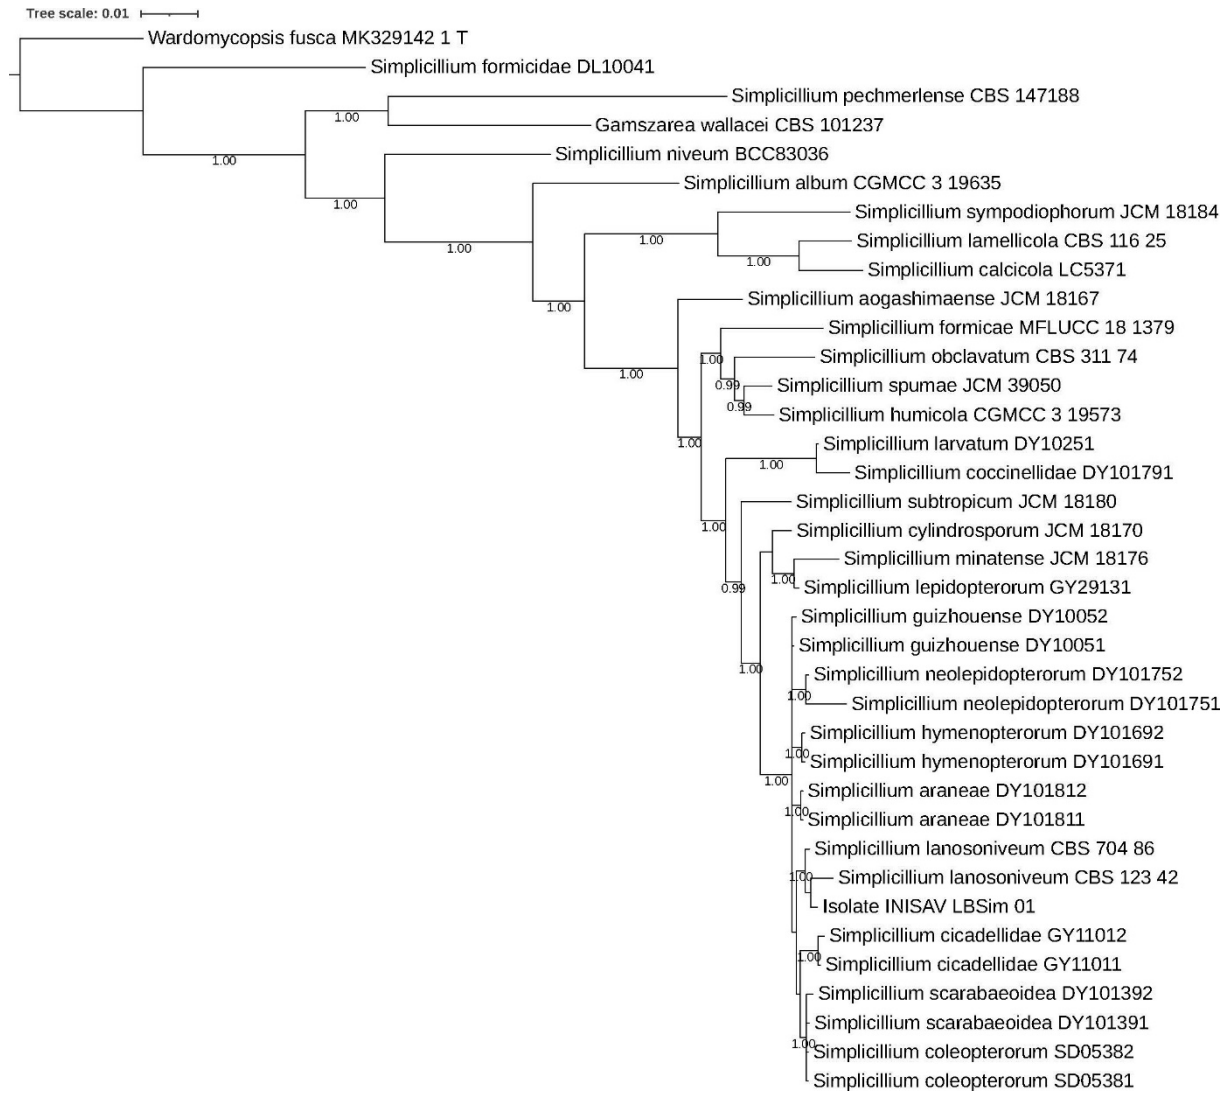

**Supplementary Figure. S2.** Phylogenetic relationships of isolate LBSim-01 with related taxa derived from Bayesian posterior probability analysis using the concatenated sequences of ITS, LSU and EF1A with *Wardomycesopsis fusca* as the outgroup. Bayesian posterior probability values (PP  $\geq$  0.90) were shown at the nodes. Bar = 0.02 substitutions per nucleotide position.

**Supplementary Table. S1.** Reference data sets of fungal strains and marker sequences used for phylogenetic analysis.

| Genus, Species, Strain Designations             | ITS      | LSU      | EF1A     |
|-------------------------------------------------|----------|----------|----------|
| <i>Simplicillium aogashimaense</i> _JCM_18167   | AB604002 | LC496874 | LC496904 |
| <i>Simplicillium araneae</i> _DY101811          | OM743774 | OM743792 | OM818465 |
| <i>Simplicillium araneae</i> _DY101812          | OM743840 | OM743846 | OM818466 |
| <i>Simplicillium cicadellidae</i> _GY11011      | MN006243 | n.a.     | MN022263 |
| <i>Simplicillium cicadellidae</i> _GY11012      | MN006244 | n.a.     | MN022264 |
| <i>Simplicillium coccinellidae</i> _DY101791    | MT453861 | n.a.     | MT471341 |
| <i>Simplicillium coleopterorum</i> _SD05381     | OM743920 | OM743925 | OM818467 |
| <i>Simplicillium coleopterorum</i> _SD05382     | OM744109 | OM744170 | OM818468 |
| <i>Simplicillium cylindrosporium</i> _JCM_18170 | AB603994 | LC496877 | LC496907 |
| <i>Simplicillium formicae</i> _MFLUCC_18-1379   | MK766511 | MK766512 | MK926451 |
| <i>Simplicillium guizhouense</i> _DY10051       | OM743225 | OM743226 | OM818453 |

|                                                  |           |           |          |
|--------------------------------------------------|-----------|-----------|----------|
| <i>Simplicillium_guizhouense</i> _DY10052        | OM743241  | OM743252  | OM818454 |
| <i>Simplicillium_humicola</i> _CGMCC_3.19573     | NR_172845 | NG_075279 | MK336071 |
| <i>Simplicillium_hymenopterorum</i> _DY101691    | MT453848  | n.a.      | MT471337 |
| <i>Simplicillium_hymenopterorum</i> _DY101692    | MT453851  | n.a.      | MT471338 |
| <i>Simplicillium_lanosoniveum</i> _CBS_123.42    | MH856100  | MH867593  | n.a.     |
| <i>Simplicillium_lanosoniveum</i> _CBS_704.86    | AJ292396  | AF339553  | DQ522358 |
| <i>Simplicillium_larvatum</i> _DY10251           | OM743255  | OM743351  | OM818457 |
| <i>Simplicillium_lepidopterorum</i> _GY29131     | MN006246  | n.a.      | MN022265 |
| <i>Simplicillium_minatense</i> _JCM_18176        | AB603992  | n.a.      | n.a.     |
| <i>Simplicillium_neolepidopterorum</i> _DY101751 | MT453854  | n.a.      | MT471339 |
| <i>Simplicillium_neolepidopterorum</i> _DY101752 | MT453857  | n.a.      | MT471340 |
| <i>Simplicillium_obclavatum</i> _CBS_311.74      | AJ292394  | AF339517  | EF468798 |
| <i>Simplicillium_scarabaeoidea</i> _DY101391     | MT453842  | n.a.      | MT471335 |
| <i>Simplicillium_scarabaeoidea</i> _DY101392     | MT453845  | n.a.      | MT471336 |
| <i>Simplicillium_spumae</i> _JCM_39050           | LC496869  | LC496883  | LC496913 |
| <i>Simplicillium_subtropicum</i> _JCM_18180      | AB603990  | LC496880  | LC496910 |
| <i>Simplicillium_calcicola</i> _LC5371           | KU746705  | KU746751  | KX855251 |
| <i>Simplicillium_sympodiophorum</i> _JCM_18184   | AB604003  | LC496882  | LC496912 |
| <i>Simplicillium_lamellicola</i> _CBS_116.25     | AJ292393  | AF339552  | DQ522356 |
| <i>Simplicillium_album</i> _CGMCC_3.19635        | NR_172844 | NG_075278 | MK336068 |
| <i>Simplicillium_niveum</i> _BCC83036            | MW621499  | MW620992  | MW603488 |
| <i>Simplicillium_pechmerlense</i> _CBS_147188    | MW031272  | MW031268  | MW033224 |
| <i>Simplicillium_formicidae</i> _DL10041         | MN006241  | n.a.      | n.a.     |
| <i>Gamszarea_wallacei</i> _CBS_101237            | NR_111267 | NG_042398 | EF469073 |

n.a. = not available

**Supplementary Table. S2.**Best hit sequence entries identified by the respective LBSim-01 query in the GenBank database.

| Hit Number | Genus, Species, Strain                               | Accession Number | Query coverage | Percent Identity |
|------------|------------------------------------------------------|------------------|----------------|------------------|
| <b>ITS</b> |                                                      |                  |                |                  |
| 1          | <i>Simplicillium lanosoniveum</i> strain V-93        | MT508802         | 100%           | 100.00           |
| 2          | <i>Simplicillium lanosoniveum</i> culture CBS:531.72 | MH860557         | 100%           | 100.00           |
| 3          | <i>Simplicillium lanosoniveum</i> culture CBS:321.72 | MH860488         | 100%           | 100.00           |

|            |                                                              |          |      |        |
|------------|--------------------------------------------------------------|----------|------|--------|
| 4          | <i>Simplicillium lanosoniveum</i> isolate<br>SSBG2           | MG807436 | 100% | 100.00 |
| 5          | <i>Simplicillium</i> sp. isolate 327                         | OQ878337 | 100% | 100.00 |
| <b>LSU</b> |                                                              |          |      |        |
| 1          | <i>Simplicillium lanosoniveum</i> isolate<br>MFLUCC: 18-1385 | MK752849 | 100% | 100.00 |
| 2          | <i>Simplicillium lanosoniveum</i> culture<br>CBS:322.72      | MH877737 | 100% | 100.00 |
| 3          | <i>Simplicillium</i> sp. strain DY091482                     | OR121067 | 100% | 100.00 |
| 4          | <i>Simplicillium</i> sp. strain DY091481                     | OR121065 | 100% | 100.00 |
| 5          | <i>Simplicillium</i> sp. strain DY09922                      | OR121061 | 100% | 100.00 |
| <b>TEF</b> |                                                              |          |      |        |
| 1          | <i>Simplicillium lanosoniveum</i> isolate<br>CBS322.72       | OQ471195 | 89%  | 99.63  |
| 2          | <i>Simplicillium lanosoniveum</i> voucher<br>CERI-542        | MT131818 | 99%  | 99.56  |
| 3          | <i>Simplicillium lanosoniveum</i> voucher<br>CHE-CNRCB-544   | OP820494 | 99%  | 99.56  |
| 4          | <i>Simplicillium lanosoniveum</i> strain<br>MFLUCC 18_1385   | MK926450 | 99%  | 99.56  |
| 5          | <i>Simplicillium lanosoniveum</i> voucher<br>CHE-CNRCB-977   | OP832376 | 99%  | 99.56  |
